# Supplementary material for: Alpha-1-antitrypsin and its variant-dependent role in COVID-19 pathogenesis
Source: PubMed Central journal article supplement — bioRxiv. 2023 May 8:2020.08.14.248880. Originally published 2020 Aug 15. Preprint. [Version 2] doi: 10.1101/2020.08.14.248880 (PMC7430570; doi:10.1101/2020.08.14.248880), 2023-05-08

Supplemental Figure 1. Spike ELISA data and full neutralization curves.

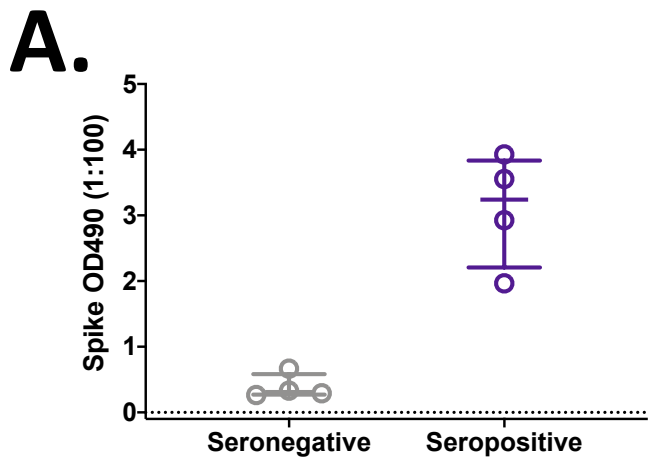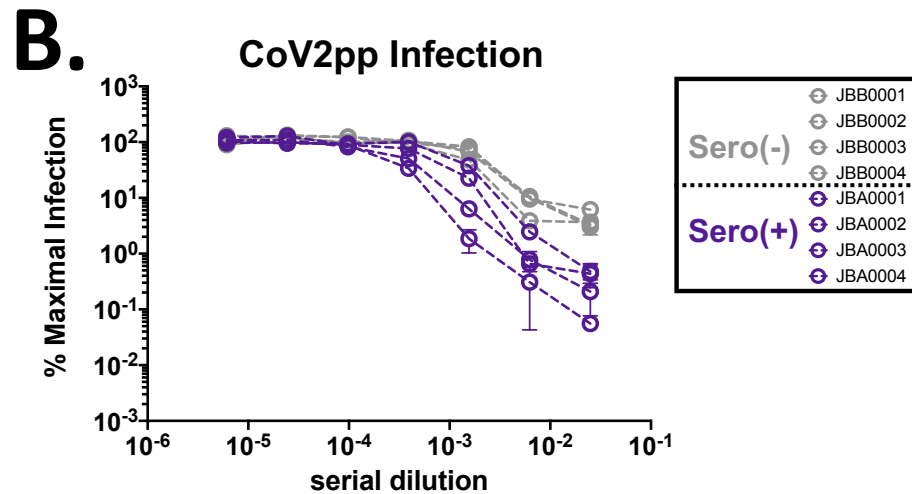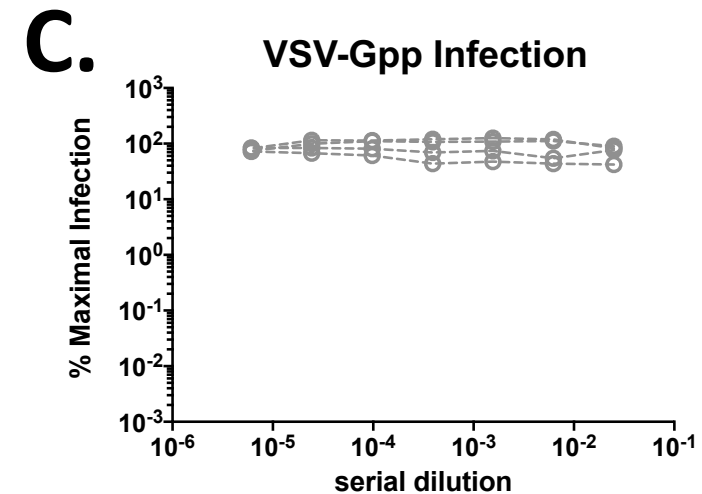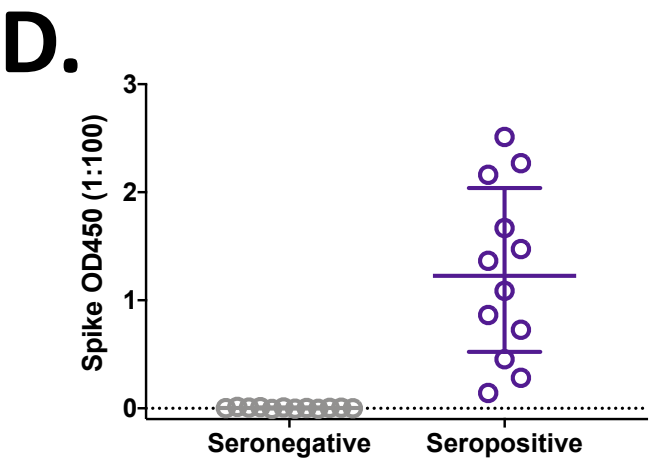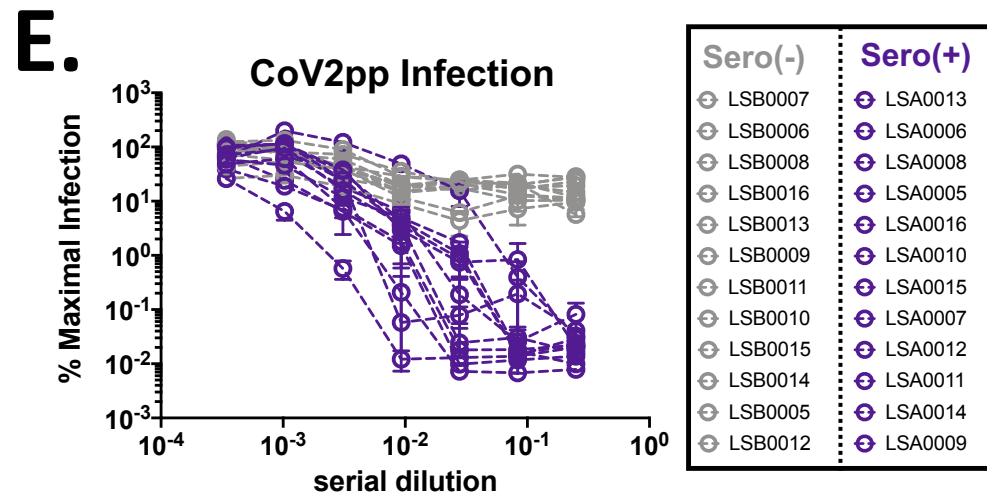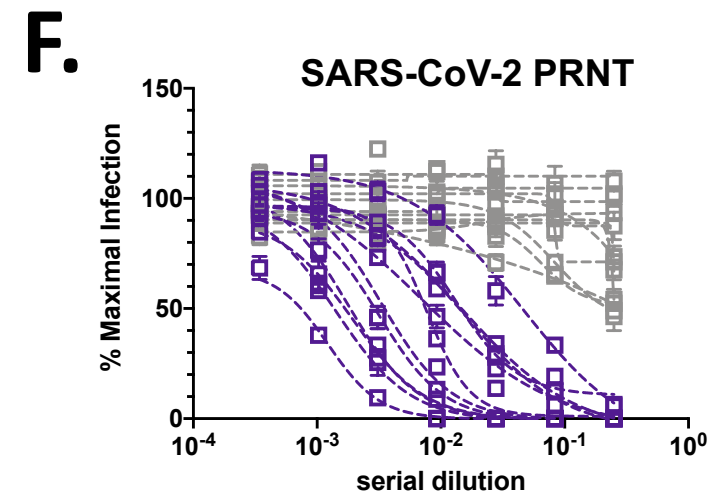

Supplemental Figure 2. Nafamostat mesylate inhibits CoV2pp entry into TMPRSS2 expressing cells.

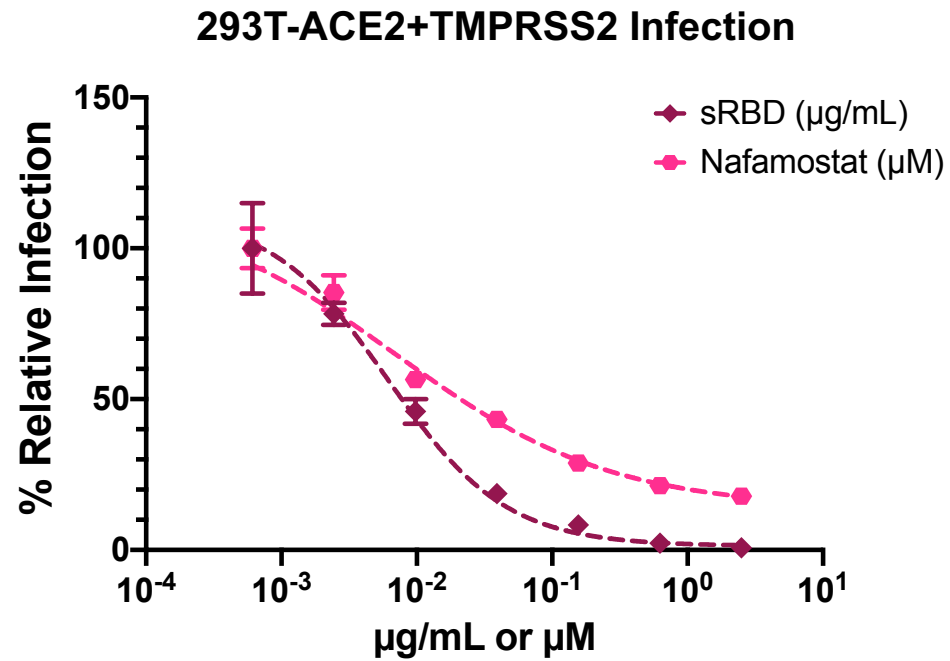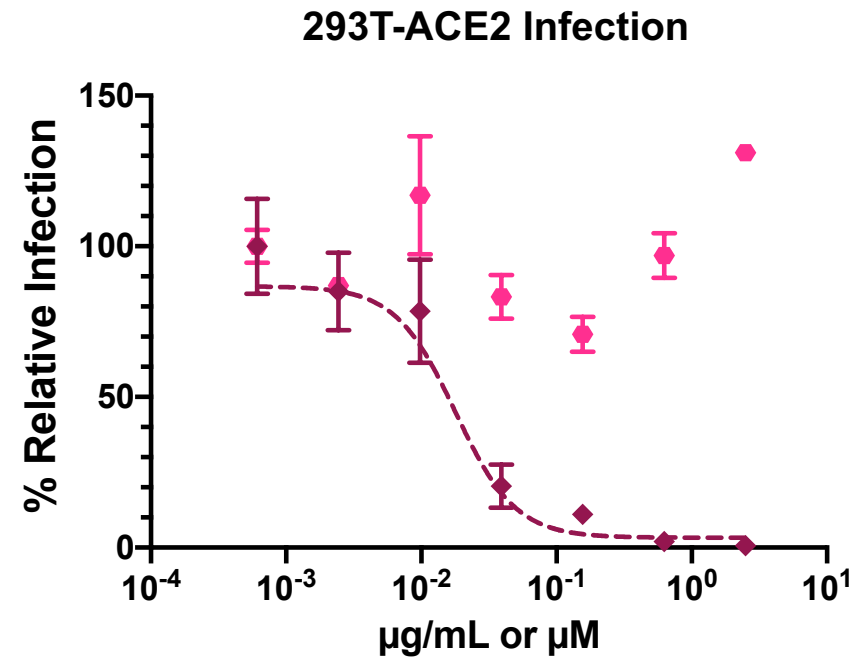

Supplement: media-1.pdf [file media-1.pdf]
